# Supplementary material
Source: MDPI journal article supplement (https://www.mdpi.com/2073-4395/12/6/1404)
Supplement: s1 [file s1]

# **Grapevine Sugar Concentration Model (GSCM): A decision support tool for the Douro Superior winemaking region**

Nicolò Clemente<sup>1</sup>, João A. Santos<sup>1,2</sup>, Natacha Fontes<sup>3</sup>, António Graça<sup>3</sup>, Igor Gonçalves<sup>4</sup> and Helder Fraga<sup>1,2\*</sup>

<sup>1</sup>*Centre for the Research and Technology of Agro-Environmental and Biological Sciences, CITAB, Universidade de Trás-os-Montes e Alto Douro, UTAD, 5000-801 Vila Real, Portugal*

<sup>2</sup>*Institute for Innovation, Capacity Building and Sustainability of Agri-food Production, Universidade de Trás-os-Montes e Alto Douro, UTAD, 5000-801 Vila Real, Portugal*

<sup>3</sup>*Sogrape, Rua 5 de outubro, 4527, 4430-809 Avintes, Portugal, 4430-809 Avintes, Portugal*

<sup>4</sup>*Associação para o Desenvolvimento da Viticultura Duriense, Edifício Centro de Excelência da Vinha e do Vinho Parque de Ciência e Tecnologia de Vila Real, Régia Douro Park, Portugal*

\*corresponding author: hfraga@utad.pt

## **Supplementary material**

**Table S1:** Three versions of the models used in the present study. All models are performed under cross-validation for each location.

|                                 | 1 <sup>st</sup> Version (free d and e) |      |        |        | 2 <sup>nd</sup> Version (d fixed, free e) |      |       |        | 3 <sup>rd</sup> Version (d and e fixed) |      |          |
|---------------------------------|----------------------------------------|------|--------|--------|-------------------------------------------|------|-------|--------|-----------------------------------------|------|----------|
| Estates and sugar concentration | RMSE                                   | EFF  | e      | d      | RMSE                                      | EFF  | e     | d      | RMSE                                    | EFF  | fSigmoid |
| <b>TN1 170</b>                  | 2.24                                   | 0.91 | 17.39  | -36.11 | 2.25                                      | 0.91 | 17.38 | -30.00 | 3.22                                    | 0.81 | 78.45    |
| <b>TN1 180</b>                  | 3.59                                   | 0.86 | 16.34  | -31.75 | 3.05                                      | 0.86 | 18.02 | -30.00 | 3.01                                    | 0.86 | 82.80    |
| <b>TN1 190</b>                  | 3.64                                   | 0.85 | 17.97  | -30.67 | 3.62                                      | 0.85 | 17.96 | -30.00 | 3.62                                    | 0.85 | 87.64    |
| <b>TN1 200</b>                  | 5.25                                   | 0.79 | 16.43  | -37.98 | 5.20                                      | 0.80 | 16.32 | -30.00 | 5.08                                    | 0.78 | 92.29    |
| <b>TN1 210</b>                  | 6.02                                   | 0.77 | 16.30  | -31.88 | 5.90                                      | 0.78 | 16.37 | -30.00 | 6.63                                    | 0.72 | 99.78    |
| <b>TN1 220</b>                  | 7.15                                   | 0.74 | 18.35  | -37.61 | 7.10                                      | 0.74 | 18.31 | -30.00 | 7.62                                    | 0.70 | 102.11   |
| <b>TN1 230</b>                  | 8.72                                   | 0.70 | 18.26  | -32.25 | 8.66                                      | 0.71 | 18.30 | -30.00 | 8.78                                    | 0.66 | 105.64   |
| <b>TN2 170</b>                  | 12.25                                  | 0.62 | 24.16  | -23.12 | 12.14                                     | 0.63 | -0.10 | -30.00 | 17.00                                   | 0.27 | 40.00    |
| <b>TN2 180</b>                  | 10.25                                  | 0.63 | 24.13  | -37.64 | 10.26                                     | 0.63 | 24.09 | -30.00 | 13.48                                   | 0.35 | 44.02    |
| <b>TN2 190</b>                  | 5.14                                   | 0.85 | 24.17  | -39.24 | 5.26                                      | 0.85 | 24.22 | -30.00 | 9.00                                    | 0.55 | 51.19    |
| <b>TN2 200</b>                  | 2.91                                   | 0.92 | 22.16  | -16.44 | 2.70                                      | 0.93 | 22.31 | -30.00 | 4.91                                    | 0.76 | 57.19    |
| <b>TN2 210</b>                  | 1.96                                   | 0.92 | 20.44  | -29.71 | 1.64                                      | 0.94 | 20.84 | -30.00 | 1.86                                    | 0.93 | 64.71    |
| <b>TN2 220</b>                  | 2.16                                   | 0.93 | 19.76  | -26.09 | 1.81                                      | 0.95 | 18.99 | -30.00 | 5.43                                    | 0.54 | 70.75    |
| <b>TN2 230</b>                  | 2.97                                   | 0.79 | 19.58  | -29.47 | 2.49                                      | 0.94 | 19.34 | -30.00 | 5.82                                    | 0.74 | 78.76    |
| <b>TN3 170</b>                  | 2.08                                   | 0.91 | 19.57  | -34.25 | 2.87                                      | 0.84 | 8.60  | -30.00 | 3.17                                    | 0.80 | 65.81    |
| <b>TN3 180</b>                  | 4.90                                   | 0.66 | 19.41  | -30.41 | 2.59                                      | 0.87 | 18.54 | -30.00 | 5.72                                    | 0.53 | 54.26    |
| <b>TN3 190</b>                  | 6.48                                   | 0.53 | -10.82 | -3.32  | 6.33                                      | 0.55 | 19.65 | -30.00 | 3.17                                    | 0.80 | 50.62    |
| <b>TN3 200</b>                  | 6.96                                   | 0.54 | 19.40  | -39.83 | 6.99                                      | 0.54 | 19.42 | -30.00 | 7.86                                    | 0.41 | 72.29    |
| <b>TN3 210</b>                  | 6.52                                   | 0.61 | 19.40  | -32.40 | 6.54                                      | 0.61 | 19.39 | -30.00 | 7.49                                    | 0.48 | 78.28    |
| <b>TN3 220</b>                  | 4.09                                   | 0.85 | 19.38  | -38.54 | 4.03                                      | 0.85 | 19.40 | -30.00 | 5.32                                    | 0.74 | 83.92    |
| <b>TN3 230</b>                  | 3.12                                   | 0.89 | 20.05  | -34.13 | 3.05                                      | 0.91 | 19.79 | -30.00 | 4.41                                    | 0.82 | 91.23    |
| <b>TF1 170</b>                  | 6.64                                   | 0.76 | 25.03  | -37.30 | 6.66                                      | 0.76 | 24.98 | -30.00 | 8.69                                    | 0.60 | 65.71    |
| <b>TF1 180</b>                  | 3.62                                   | 0.87 | 19.96  | -25.16 | 2.86                                      | 0.92 | 18.37 | -30.00 | 3.68                                    | 0.86 | 74.87    |
| <b>TF1 190</b>                  | 4.82                                   | 0.80 | 18.32  | -34.30 | 4.83                                      | 0.80 | 18.34 | -30.00 | 6.21                                    | 0.67 | 79.17    |
| <b>TF1 200</b>                  | 4.78                                   | 0.84 | 18.41  | -39.40 | 4.79                                      | 0.84 | 18.48 | -30.00 | 5.61                                    | 0.78 | 87.82    |
| <b>TF1 210</b>                  | 6.66                                   | 0.76 | 18.09  | -23.07 | 6.59                                      | 0.77 | 18.50 | -30.00 | 7.14                                    | 0.73 | 96.46    |
| <b>TF1 220</b>                  | 6.11                                   | 0.85 | 19.08  | -35.98 | 6.15                                      | 0.85 | 19.11 | -30.00 | 6.37                                    | 0.84 | 102.81   |
| <b>TF1 230</b>                  | 5.71                                   | 0.87 | 18.55  | -39.96 | 5.59                                      | 0.88 | 18.52 | -30.00 | 5.64                                    | 0.87 | 107.60   |
| <b>TF2 170</b>                  | 10.11                                  | 0.74 | 25.65  | -26.56 | 14.02                                     | 0.56 | 26.80 | -30.00 | 20.04                                   | 0.10 | 55.87    |
| <b>TF2 180</b>                  | 4.98                                   | 0.90 | 26.98  | -7.59  | 7.71                                      | 0.62 | 17.94 | -30.00 | 12.69                                   | 0.20 | 53.67    |
| <b>TF2 190</b>                  | 4.72                                   | 0.77 | 17.60  | -24.30 | 4.28                                      | 0.76 | 17.67 | -30.00 | 7.69                                    | 0.42 | 60.46    |
| <b>TF2 200</b>                  | 2.86                                   | 0.87 | 17.52  | -22.50 | 2.74                                      | 0.87 | 19.45 | -30.00 | 4.09                                    | 0.71 | 72.17    |
| <b>TF2 210</b>                  | 2.85                                   | 0.87 | 23.24  | -14.24 | 1.65                                      | 0.96 | 20.01 | -30.00 | 4.50                                    | 0.75 | 78.86    |
| <b>TF2 220</b>                  | 3.63                                   | 0.87 | 21.24  | -21.60 | 2.74                                      | 0.91 | 22.75 | -30.00 | 5.10                                    | 0.78 | 91.37    |
| <b>TF2 230</b>                  | 5.36                                   | 0.91 | 21.56  | -10.39 | 4.91                                      | 0.91 | 21.55 | -30.00 | 5.25                                    | 0.85 | 96.95    |

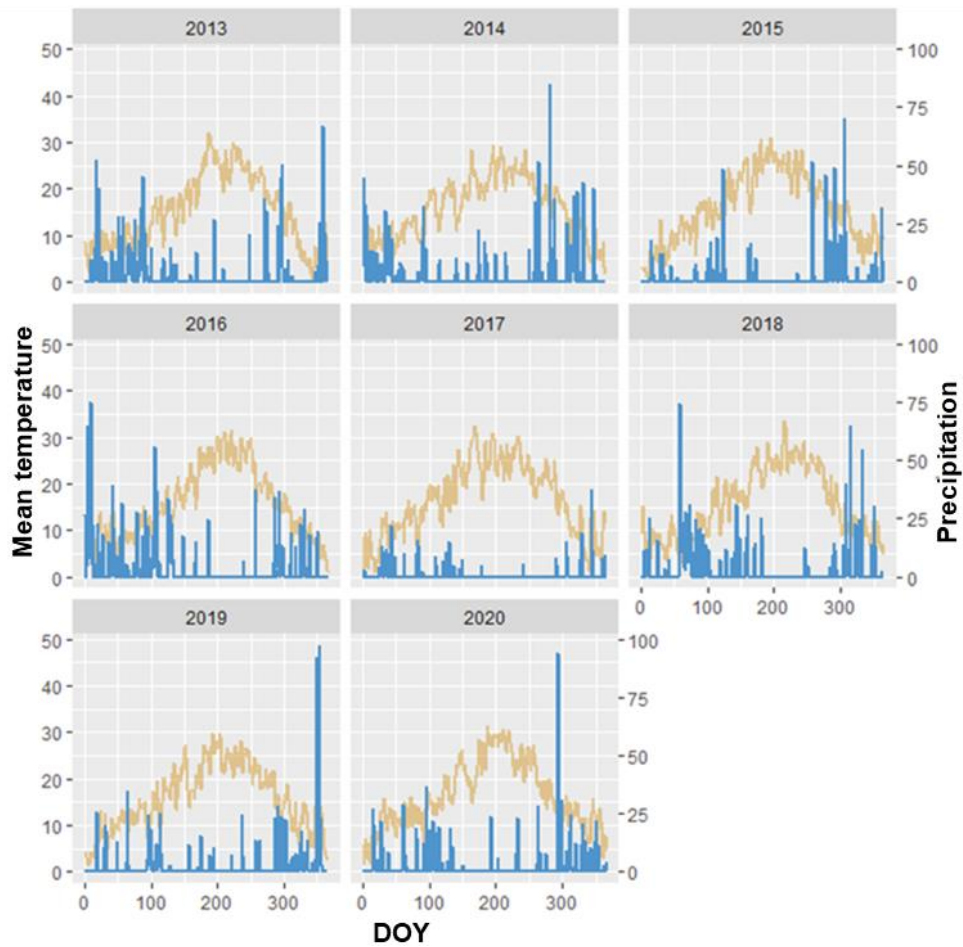

**Figure S1:** Bagnols & Gaussen diagram for each year separately and for estate TN1. Yellow curves correspond to the daily mean temperature (in °C, left y-axis), while blue bars correspond to the daily total precipitation (in mm, right y-axis).

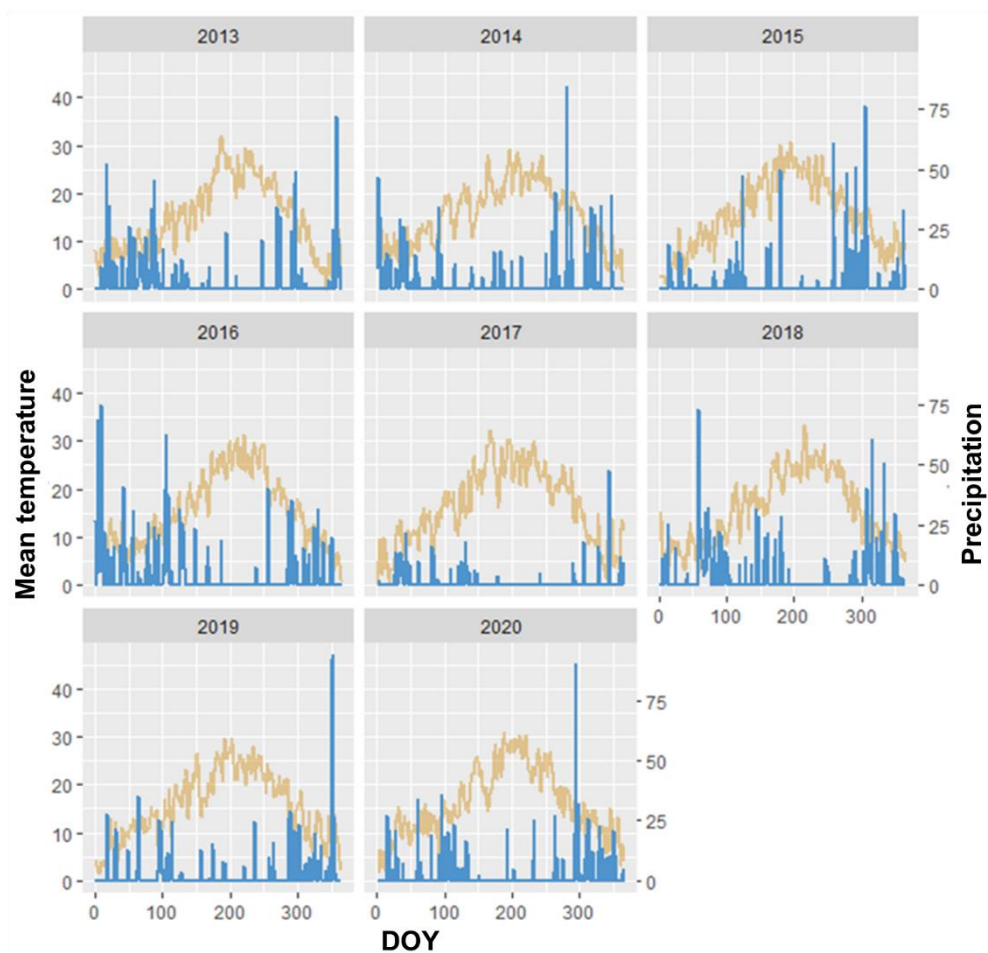

**Figure S2:** As in Figure S1 but estate TN2.

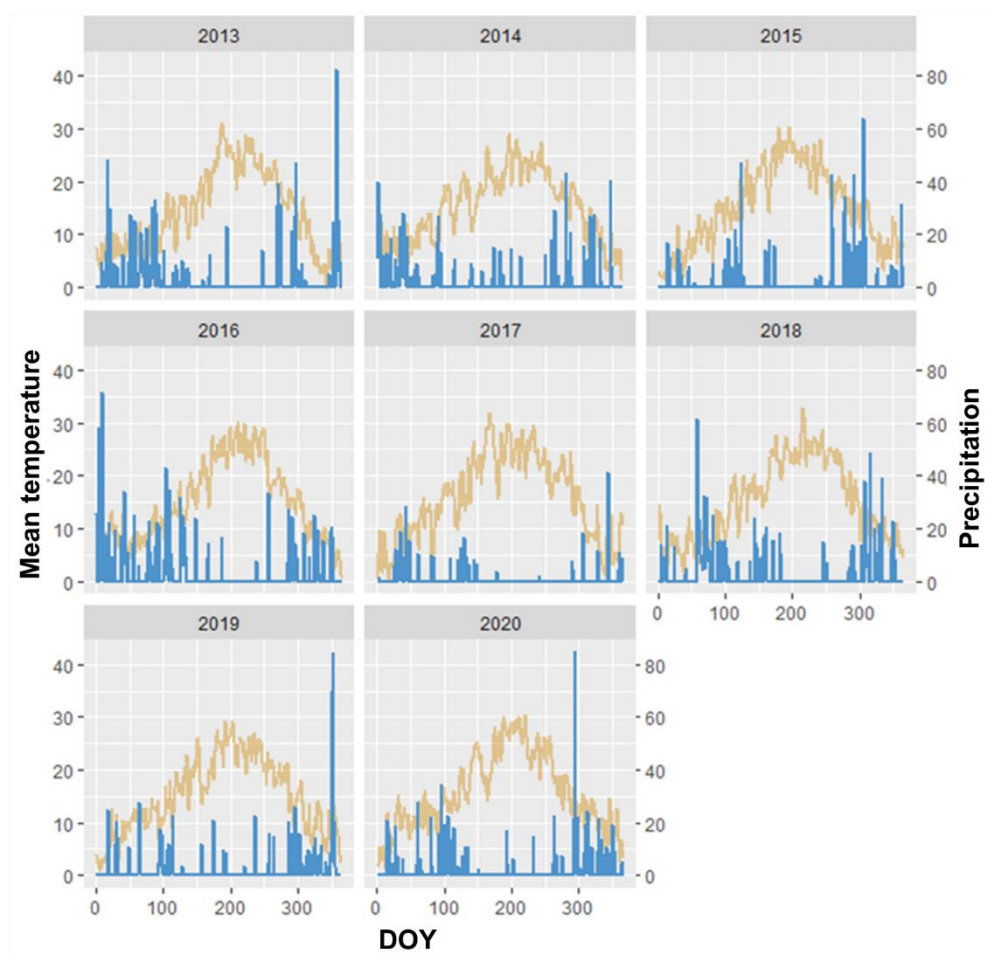

**Figure S3:** As in Figure S1 but estate TN3.

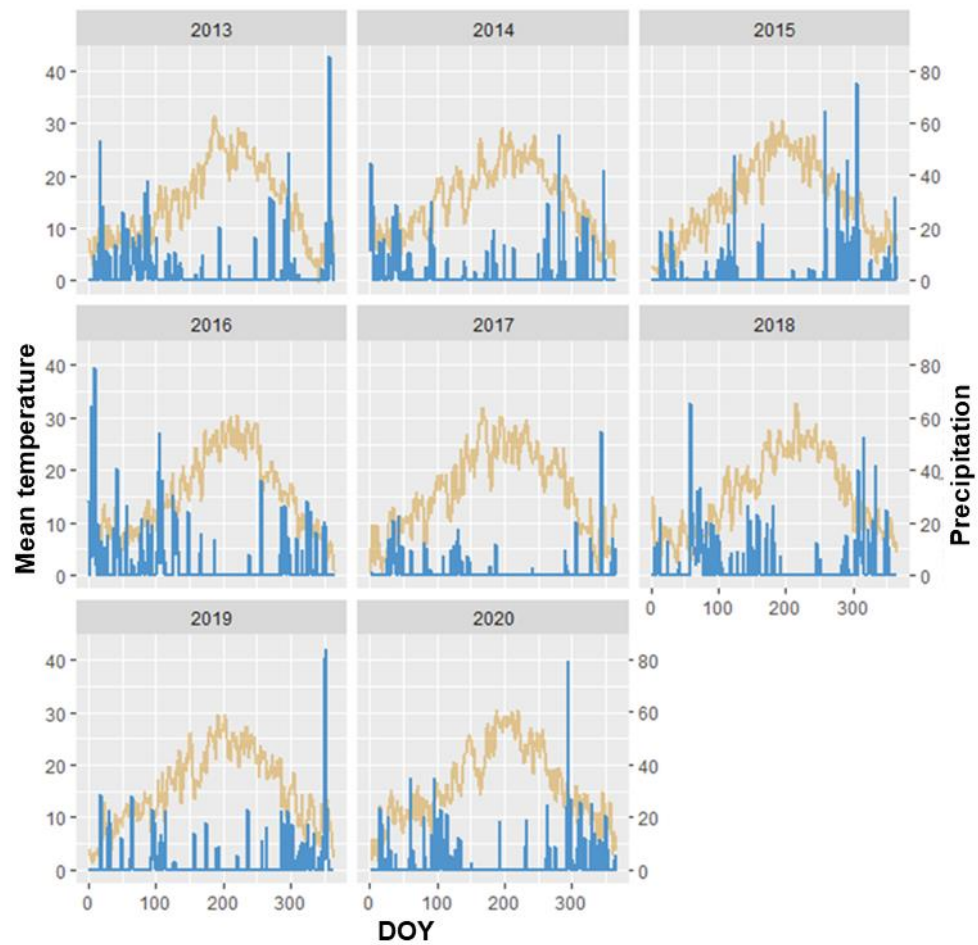

**Figure S4:** As in Figure S1 but estate TF1.

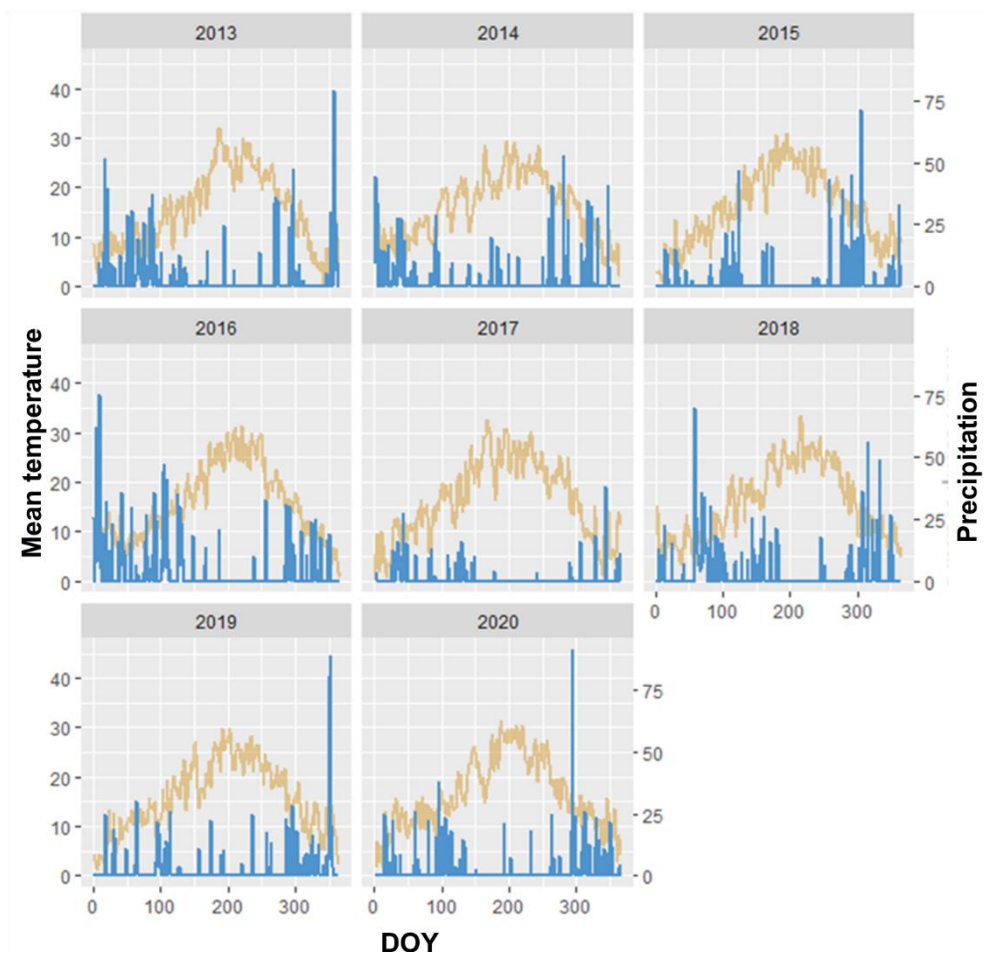

**Figure S5:** As in Figure S1 but estate TF2.
